# Supplementary material
Source: Research Square preprint supplement (doi:10.21203/rs.3.rs-13146/v2)
Supplement: Supplementary file 1 [file 00539b98effc8abc98d9ea09.xlsx]

## Sheet: Sheet1
Patients ID	Bw4/Bw4	Bw4/Bw6	Bw6/Bw6	80I	C1	C1/C2	C2	2DS3	2DS2	2DS1	2DL5	2DL4	2DL3	2DL2	2DL1	DRB1	2DP1	3DS1	3DL3	3DL2	3DL1	2DS5	2DS4	GENDER	transmission	log HIVRNA	HIV LOAD 4W	HIV LOAD 8W	baseline CD4	baseline CD8	baseline CD4/CD8	12w CD4	12w CD8	12w CD4/CD8	24w CD4	24wCD8	24w CD4/CD8		24w HIVRNA
A017																								MALE	blood	5.22789	3.2833	2.65896	354	1064	0.332707	493	477	1.03354			#DIV/0!
A027																								MALE	hetersexual	5.93197	3.74273	3.29667	469	3031	0.154734	474	2279	0.207986	510	1784	0.285874	200	2.30103
A043																								MALE	hetersexual	4.233	2.02119	2.11727	327	827	0.395405	248	477	0.519916	366	545	0.67156	50	1.69897
A071																								MALE	hetersexual	3.1186	1.7356	1.69897	445	1104	0.40308			#DIV/0!			#DIV/0!
A085																								MALE	hetersexual	5.79379	3.29447	3.02119	274	1608	0.170398	225	1113	0.202156	280	2103	0.133143
A088																								MALE	hetersexual	4.26387	1.98677	1.77085	212	483	0.438923	281	566	0.496466	308	400	0.77	20	1.30103
A107																								MALE	hetersexual	3.71517	2.12057	2.09691	220	453.5	0.485116	242	574	0.421603	236	333	0.708709	50	1.69897
A122																								MALE	hetersexual	4.66087	1.97313	1.30103	305	901	0.338513			#DIV/0!	603	1222	0.493453	40	1.60206
A132																								MALE	hetersexual	4.04532	1.98227	1.39445	267	591	0.451777			#DIV/0!			#DIV/0!
A134																								MALE	hetersexual	3.47422	2.44404	2.30535	271	660	0.410606	306	935	0.327273			#DIV/0!
A137																								MALE	hetersexual	4.95036	2.07188	1.60746	263	1302	0.201997			#DIV/0!			#DIV/0!
A138																								MALE	hetersexual	3.21748	3.16435	2.65992	266	1202	0.221298	282	1556	0.181234	266	848	0.313679	40	1.60206
A146																								MALE	hetersexual	5.34044	2.45025	2.41162	269	1147	0.234525	518	652	0.794479	634	765	0.828758	35.6	1.55145
A151																								MALE	hetersexual	3.58883	2.0086	2.35411	436	790	0.551899	364	553	0.658228	432	654	0.66055	50	1.69897
A161																								MALE	hetersexual	3.89542	1.94201	1.77452	217	629	0.344992	235	629	0.373609	287	599	0.479132	50	1.69897
A162																								MALE	hetersexual	4.68842	2.53908	2.70157	356	1286.5	0.27672	546	1514	0.360634	417	1059	0.393768	50	1.69897
A171																								MALE	hetersexual	3.49276	1.98498	1.30103	449	889	0.505062	918	1151	0.797567	657	627	1.04785	50	1.69897
A172																								MALE	hetersexual	3.82151	4.03342	4	443	791	0.560051	342	750	0.456	412	630	0.653968	20	1.30103
A045																								FEMALE	hetersexual	3.46835	2.35025	1.87795	238	1190	0.2	224	863	0.25956	202	573	0.352531	50	1.69897
A097																								FEMALE	hetersexual	4.42488	2.13672	1.30103	575	1033	0.556631	693	600	1.155	487	385	1.26494	50	1.69897
A143																								FEMALE	hetersexual	4.5966	2.55023	2.36736	187	608	0.307566	342	445	0.768539	308	344	0.895349	20	1.30103
A001																								MALE	homosexual	5.08636	2.72016	3.60097	235	380	0.618421	397	231	1.71861	360	258	1.39535	24.2	1.38382
A002																								MALE	homosexual	5.34439	2.93601	2.9154	426	2422	0.175888	270	863	0.312862	361	986	0.366126	95.9	1.98182
A005																								MALE	homosexual	3.92221	2.98811	2.94939	268	812	0.330049	371	1058	0.350662	426	982	0.433809	41.8	1.62118
A006																								MALE	homosexual	4.18752	1.96426	1.69548	387	441	0.877551	460	457	1.00656	508	425	1.19529	50	1.69897
A008																								MALE	homosexual	4.15836	1.7356	1.30103	374	855	0.437427	577	1146	0.50349	428	678	0.631268	50	1.69897
A009																								MALE	homosexual	4.07555	2.48144	2.30535	184	730	0.252055	319	729	0.437586	235	541	0.434381	51.1	1.70842
A010																								MALE	homosexual	5.32838	2.18184	2.33244	387	980	0.394898	459	975	0.470769	332	625	0.5312	20	1.30103
A013																								MALE	homosexual	4.7348	2.82802	2.0607	240	761	0.315375	267	418	0.638756	337	480	0.702083	20	1.30103
A014																								MALE	homosexual	3.71517	2.19033	2.52375	405	453	0.89404	376	559	0.67263	370	347	1.06628	20	1.30103
A015																								MALE	homosexual	4.16435	1.91855	1.47857	468	505	0.926733	624	670	0.931343	648	600	1.08	50	1.69897
A016																								MALE	homosexual	5.3032	2.07188	1.69897	323	748	0.431818	463	705	0.656738			#DIV/0!
A018																								MALE	homosexual	4.81823	2.72509	2.55267	208	283	0.734982	426	463	0.920086	431	541	0.796673	20	1.30103
A019																								MALE	homosexual	3.71012	1.30103	1.30103	482	1480	0.325676	494	1258	0.392687	478	880	0.543182	40	1.60206
A020																								MALE	homosexual	5.07555	3.04139	2.51055	413	1564	0.264066	492	500	0.984	377	346	1.0896	50	1.69897
A021																								MALE	homosexual	3.4624	2.20952	2.0607	445	1516	0.293536	562	1190	0.472269	301	525	0.573333	20	1.30103
A022																								MALE	homosexual	3.73159	1.35218	1.64246	310	1414	0.219236	264	866	0.30485	364	351	1.03704	50	1.69897
A023																								MALE	homosexual	4.65896	2.49831	2.29885	373	735	0.507483	459	597	0.768844	328	289	1.13495	50	1.69897
A031																								MALE	homosexual	4.21484	2.08279	1.64836	322	962	0.334719	493	895	0.550838	377	610	0.618033	20	1.30103
A032																								MALE	homosexual	3.62634	2.53782	2.44248	400	1493	0.267917	380	999	0.38038	421	1037	0.405979	48.2	1.68305
A034																								MALE	homosexual	3.82737	2.51983	2.3032	422	1209	0.349049	508	884	0.574661	549	944	0.581568	50	1.69897
A035																								MALE	homosexual	4.22011	2.71012	2.22531	324	442	0.733032	361	496	0.727823	388	388	1	20	1.30103
A037																								MALE	homosexual	4.7796	1.93399	1.86923	362	1456	0.248626	554	1562	0.354673	380	803	0.473225	20	1.30103
A038																								MALE	homosexual	4.89098	2.50515	2.45788	288	892	0.32287	391	992	0.394153	388	1038	0.373796	20	1.30103
A040																								MALE	homosexual	3.28556	2.08991	1.30103	322	1803	0.178591	408	1286	0.317263	429	1179	0.363868	50	1.69897
A041																								MALE	homosexual	4.49136	2.23805	1.30103	304	890	0.341573	413	736	0.561141			#DIV/0!
A042																								MALE	homosexual	4.62634	2.19312	1.69897	404	434	0.930876	349	479	0.728601	346	389	0.88946	20	1.30103
A044																								MALE	homosexual	3.58995	2.55751	1.45939	222	976	0.227459			#DIV/0!	293	395	0.741772	50	1.69897
A048																								MALE	homosexual	5.09342	2.86273	1.92942	343	1052.5	0.325891	325	901	0.36071	397	1204	0.329734	20	1.30103
A049																								MALE	homosexual	6.15534	4.07555	3.11059	237	757.5	0.312871	358	734	0.487738	335	781	0.428937	77.7	1.89042
A051																								MALE	homosexual	5.77305	3.64246	3.08636	436	643	0.678072	468	865	0.54104	365	421	0.866983	69.9	1.84448
A054																								MALE	homosexual	3.61066	2.32015	2.35603	357	1525	0.234098	497	627	0.792663	432	474	0.911392	22.1	1.34439
A055																								MALE	homosexual	4.46389	2.2014	2.31806	522	2063	0.25303	574	1649	0.34809	611	1581	0.386464	50	1.69897
A057																								MALE	homosexual	6.93702	3.5172	3.21748	212	834	0.254197	652	1573	0.414495	787	1537	0.512036	40.5	1.60746
A059																								MALE	homosexual	3.67578	1.30103	1.50515	360	1039.5	0.34632	489	930	0.525806	467	1149	0.40644	50	1.69897
A060																								MALE	homosexual	4.43933	2.22531	2.16137	606	865	0.700578			#VALUE!	447	784	0.570153
A061																								MALE	homosexual	3.70672			348	1514	0.229855	417	1182	0.352792	332	1067	0.311153	20	1.30103
A062																								MALE	homosexual	4.71767	3	1.43933	278	817	0.340269	470	564	0.833333	495	494	1.00202	81.7	1.91222
A063																								MALE	homosexual	3.00432	2.0569	1.78958	493	2564	0.192278			#DIV/0!	382	1446	0.264177
A065																								MALE	homosexual	5.21484	3.18469	2.90363	281	1844	0.152386	206	562	0.366548	188	373	0.504021	50	1.69897
A068																								MALE	homosexual	3.72263	2.22272	2.02938	236	968	0.243802	210	496	0.423387	253	710	0.356338	50	1.69897
A069																								MALE	homosexual	4.24797	1.95036	2.09342	472	945	0.499471	353	565	0.624779	366	547	0.669104	20	1.30103
A070																								MALE	homosexual	4.46982	2.01703	2.17609	326	1131	0.28824	296	361	0.819945	326	654	0.498471	20	1.30103
A072																								MALE	homosexual	5.14613	2.87448	2.72428	291	1524	0.190945	382	1263	0.302454	390	1436	0.271588	20	1.30103
A074																								MALE	homosexual	4.60853	3.42651	2.32838	258	1017	0.253687	387	822	0.470803	278	614	0.452769	20	1.30103
A075																								MALE	homosexual	3.5092	2.04922	1.94101	440	547	0.804388	204	520	0.392308	278	574	0.484321	20	1.30103
A076																								MALE	homosexual	4.24304	1.76268	1.72673	367	672	0.546131	385	725	0.531034	320	619	0.516963	50	1.69897
A078																								MALE	homosexual	4.61066	2.48287	2.32015	263	818	0.321516	290	885	0.327684	319	751	0.424767	20	1.30103
A080																								MALE	homosexual	3.77597	2.33846	2.26245	210	1300	0.161538	275	1051	0.261656	268	808	0.331683	20	1.30103
A081																								MALE	homosexual	4.29885	2.17319	2.38739	186	1174	0.158433	400	1108	0.361011	428	813	0.526445	20	1.30103
A082																								MALE	homosexual	3.54283	1.4133	1.40824	489	1065	0.459155	330	1111	0.29703	338	1019	0.331698	50	1.69897
A083																								MALE	homosexual	2.65031	1.30103	1.30103	428	699	0.612303	341	574	0.594077	426	563	0.756661	50	1.69897
A086																								MALE	homosexual	4.60097	1.99913	1.71181	287	512	0.560547	427	727	0.587345	320	619	0.516963	20	1.30103
A087																								MALE	homosexual	4.43933	1.95424	1.95134	255	317.5	0.80315	229	267	0.857678	298	368	0.809783	50	1.69897
A089																								MALE	homosexual	4.42813	1.91803	1.7185	331	724	0.457182	597	851	0.701528	640	839	0.762813	20	1.30103
A090																								MALE	homosexual	3.8488	2.33646	1.69897	420	891	0.47138			#DIV/0!			#DIV/0!
A092																								MALE	homosexual	4.17319	2.87216	2.16435	461	1092.5	0.421968	524	1270	0.412598	503	915	0.549727	50	1.69897
A094																								MALE	homosexual	3.62118	1.49136	1.94596	205	1092	0.187729	233	850	0.274118	232	835	0.277844	50	1.69897
A098																								MALE	homosexual	5.07918	2.80277	1.96142	474	916	0.517467	627	1166	0.537736	426	666	0.63964	20	1.30103
A100																								MALE	homosexual	4.66839	2.67943	2.36922	552	676.5	0.815965	684	922	0.741866	583	431	1.35267	50	1.69897
A101																								MALE	homosexual	3.57634	1.38739	1.30103	209	323.5	0.646059	233	259	0.899614	262	388	0.675258	50	1.69897
A103																								MALE	homosexual	5.2833	3.29885	2.90309	402	1490	0.269799	317	500	0.634	271	331	0.818731	50	1.69897
A106																								MALE	homosexual	4.51188	2.24551	1.69897	447	1911	0.233909	438	1389	0.315335			#DIV/0!
A108																								MALE	homosexual	4.14922	1.57403	1.48287	245	385	0.636364	256	418	0.61244	247	352	0.701705	50	1.69897
A109																								MALE	homosexual	2.98588	1.30103	1.69897	254	696	0.364943	441	641	0.687988	464	692	0.67052	50	1.69897
A110																								MALE	homosexual	3.72673	1.66464	1.30103	390	620	0.629032	445	600	0.741667	564	608	0.927632	50	1.69897
A111																								MALE	homosexual	3.74273	1.30103	1.30103	540	1278	0.422535	376	1050	0.358095	422	1294	0.326121
A113																								MALE	homosexual	4.18752	2.53908	1.71181	235	471	0.498938	247	799	0.309136	189	732	0.258197	11400	4.0569
A115																								MALE	homosexual	3.48996	1.60746	1.93247	263	1551	0.169568	354	1168	0.303082			#DIV/0!
A117																								MALE	homosexual	5.10037	2.45025	2.08636	509	1970	0.258376	505	985	0.51269	556	997	0.557673
A121																								MALE	homosexual	2.8791	1.73159	1.39967	759	1263	0.60095			#DIV/0!			#DIV/0!
A123																								MALE	homosexual	3.79239	2.03342	1.57978	403	1387	0.290555			#DIV/0!			#DIV/0!
A124																								MALE	homosexual	4.69984	3.04139	2.62221	230	1062	0.216573			#DIV/0!			#DIV/0!
A125																								MALE	homosexual	3.81224	2.43457	2.02938	313	604	0.518212	501	712	0.703652	470	753	0.62417	20	1.30103
A126																								MALE	homosexual	4.53782	3.33041	2.89542	349	1238	0.281906			#DIV/0!			#DIV/0!
A130																								MALE	homosexual	4.33445	3.42651	2.32838	348	1214	0.286656	289	1263	0.22882	249	1294	0.192427	37000	4.5682
A131																								MALE	homosexual	3.4216	2.57749	2.59879	254	620	0.409677			#DIV/0!			#DIV/0!
A139																								MALE	homosexual	4.13988	2.549	2.63548	226	443	0.510158	308	549	0.56102	316	534	0.59176	61.6	1.78958
A141																								MALE	homosexual	4.73719	3.02938	3.1959	341	3200	0.106563	267	1697	0.157336	294	1732	0.169746	53.1	1.72509
A144																								MALE	homosexual	3.64147	1.44871	1.4014	470	1049	0.448046	571	929	0.614639	710	1169	0.607357	50	1.69897
A145																								MALE	homosexual	3.97451	2.06819	1.81889	316	1027	0.307692	294	821	0.3581	282	831	0.33935	20	1.30103
A148																								MALE	homosexual	3.99432	1.95279	1.9987	551	1021.5	0.539403	430	1045	0.411483	424	998	0.42485	50	1.69897
A155																								MALE	homosexual	4.63548	2.71433	2.72509	470	961	0.489074	607	1051	0.577545	514	677	0.759232	50	1.69897
A156																								MALE	homosexual	4.51983	2.11059	1.89597	225	372	0.604839	272	461	0.590022	192	260	0.738462	50	1.69897
A158																								MALE	homosexual	4.38739	2.08636	2.14922	268	550	0.487273	293	353	0.830028	321	364	0.881868	50	1.69897
A159																								MALE	homosexual	4.32634	2.62839	2.05308	243	833	0.291717	360	750	0.48	370	639	0.57903
A163																								MALE	homosexual	2.96988	1.30103	1.60206	498	1736	0.286866	607	2409	0.251972	743	2211	0.336047
A169																								MALE	homosexual	4.99564	2.4609	1.69897	233	779	0.299101			#DIV/0!	235	424	0.554245
A175																								MALE	homosexual	5.617	2.43775	1.69897	202	1338.5	0.150915	307	1782	0.172278	176	895	0.196648	40	1.60206
A047																								MALE	homosexual	2.34044	1.30103	1.30103	507	739	0.686062	383	646	0.592879	484	733	0.6603	50	1.69897
A168																								MALE	homosexual	4.15836	2.4133	1.69897	473	1608	0.294154	527	1618	0.325711	565	1301	0.434281	50	1.69897
A003																								MALE	undetermined	5.15229	2.77525	2.79169	188	1064.5	0.176609	296	1316	0.224924	265	813	0.325953	20	1.30103
A095																								MALE	undetermined	4.34044	1.90634	1.77887	441	1794	0.245819	507	1156	0.438581	453	1095	0.413699
A142																								MALE	undetermined	4.65514	2.31597	1.75511	301	1122	0.268271	493	1302	0.378648	410	813	0.504305	50	1.69897
A157																								MALE	undetermined	4.42488	2.22531	1.86982	220	1400	0.157143	257	725	0.354483	264	915	0.288525	50	1.69897
A073																								MALE	undetermined	3.62325	1.92428	2.17898	290	666	0.435435	350	446	0.784753	379	573	0.661431	50	1.69897
